# Supplementary material for: Forest site and stand structure affecting the distribution of Emerald Ash Borer, Agrilus planipennis Fairmaire, 1888 (Coleoptera: Buprestidae) in Eastern Ukraine
Source: Preprints.org preprint supplement (doi:10.20944/preprints202402.0388.v1), 2024-02-06
Supplement: Supplementary file 1 [file supplementary]

## Sheet: maxent results
Title of the article: Forest site and stand structure affecting the distribution of Emerald Ash Borer, Agrilus planipennis Fairmaire, 1888 (Coleoptera: Buprestidae) in Eastern Ukraine
Authors: Meshkova, V.; Borysenko, O.; Kucheryavenko, T.; Vysotska, N.; Skrylnyk, Y.; Davydenko, K.; Holusa, J.
Supplement S1: Results of MaxEnt modelling of EAB spread
Species	#Training samples	Regularized training gain	Unregularized training gain	Iterations	Training AUC	#Test samples	Test gain	Test AUC	AUC Standard Deviation	#Background points	area contribution	bonitet contribution	diametr contribution	fr_any contribution	fr_excel contribution	hyhrotop contribution	neignborn contribution	povnota contribution	trofotop contribution	vik contribution	vysota contribution	area permutation importance	bonitet permutation importance	diametr permutation importance	fr_any permutation importance	fr_excel permutation importance	hyhrotop permutation importance	neignborn permutation importance	povnota permutation importance	trofotop permutation importance	vik permutation importance	vysota permutation importance	Training gain without area	Training gain without bonitet	Training gain without diametr	Training gain without fr_any	Training gain without fr_excel	Training gain without hyhrotop	Training gain without neignborn	Training gain without povnota	Training gain without trofotop	Training gain without vik	Training gain without vysota	Training gain with only area	Training gain with only bonitet	Training gain with only diametr	Training gain with only fr_any	Training gain with only fr_excel	Training gain with only hyhrotop
absence_0	28	0.6061	0.9068	440	0.8382	9	-0.3345	0.5883	0.0689	10002	1.8525	0.2738	0.718	2.3281	54.2762	4.6503	15.1251	6.9022	0.8441	13.0297	0	5.3829	0	6.8498	0	75.4778	1.9138	9.5036	0	0.872	0	0	0.5922	0.6011	0.597	0.6053	0.6034	0.5815	0.5326	0.5708	0.5993	0.597	0.6059	0.0113	0.009	0.0236	0.3209	0.3227	0.0313
absence_1	28	0.8418	1.3062	380	0.9095	9	0.3646	0.7567	0.065	10005	13.55	1.8049	0	6.5879	36.3601	6.8218	16.4806	1.3543	1.0838	13.1089	2.8477	8.7731	5.0208	0	1.9073	35.7469	6.1764	21.8107	0.5982	0.1707	15.4635	4.3325	0.7386	0.8057	0.8415	0.8359	0.8391	0.7813	0.7504	0.8299	0.8341	0.6806	0.7973	0.1442	0.0091	0.0017	0.3135	0.3143	0.0492
absence_2	28	0.4321	0.7755	520	0.8442	9	0.4305	0.7252	0.0764	10003	9.9489	0	8.3036	2.5502	3.253	0	38.968	12.3155	2.025	20.9376	1.6983	8.2515	0	5.1386	2.6274	11.8104	0	37.3626	11.421	1.627	13.5533	8.2083	0.4019	0.4321	0.4103	0.4307	0.4301	0.4324	0.2509	0.3787	0.425	0.3898	0.4261	0.0237	0.0148	0.0549	0.0211	0.0208	0.0046
absence_3	28	1.1423	1.7293	700	0.8948	9	0.2341	0.7313	0.0676	10004	5.8095	1.0755	1.0759	8.1091	25.5946	10.1331	20.6352	3.9199	4.003	18.58	1.0642	7.0173	2.295	0	4.7763	49.7805	5.435	21.4707	2.1182	1.3164	3.9786	1.812	1.0701	1.13	1.1401	1.1392	1.1401	1.0764	1.0018	1.1183	1.0942	1.089	1.1306	0.0775	0.0954	0.0434	0.4087	0.4064	0.1208
absence_4	28	0.5308	0.8421	420	0.8468	9	0.9829	0.8687	0.0508	10002	2.9545	1.8088	12.5193	5.9014	47.8048	0.0764	4.3054	3.4174	0	21.212	0	4.3753	1.2059	12.6691	2.1183	47.9987	0.0634	5.0522	3.1338	0	23.3833	0	0.5223	0.5293	0.4673	0.5282	0.5202	0.5297	0.5154	0.5158	0.5308	0.4042	0.5308	0.0303	0.0223	0.0298	0.2137	0.2165	0.0088
absence_5	28	0.7451	1.2471	420	0.8592	9	0.3239	0.7477	0.0796	10001	15.7824	4.5932	0.9378	10.6087	30.5296	0.1668	23.452	2.3732	0.471	10.4199	0.6656	10.9348	4.2035	0.4857	1.086	46.3811	0	27.2347	1.1799	0.1556	7.6548	0.684	0.6413	0.7255	0.734	0.7417	0.7428	0.7421	0.5958	0.7328	0.7422	0.6568	0.7344	0.1477	0.0354	0.0136	0.2998	0.2991	0.0158
absence_6	28	0.4709	0.7426	300	0.8177	9	0.7888	0.8448	0.0591	10004	3.0561	4.1314	0.1634	2.5506	39.2725	0.2528	25.7479	2.7149	0	21.7503	0.3602	9.3106	2.8331	0	0.8896	37.025	0.047	25.7826	2.3364	0	20.0511	1.7245	0.4565	0.4622	0.4702	0.4687	0.4689	0.4707	0.3712	0.4572	0.4709	0.3679	0.4686	0.0334	0.0175	0.0016	0.1771	0.179	0.0098
absence_7	28	0.582	0.8389	360	0.8311	9	0.4467	0.7256	0.0984	10003	16.1276	15.0976	5.3386	3.0054	33.0554	7.3503	1.6516	0.041	9.9465	8.3861	0	29.9958	5.1399	3.8283	1.3373	41.9323	5.3381	6.2175	0.033	0.7635	5.4143	0	0.4815	0.5575	0.5768	0.5804	0.5771	0.5378	0.5747	0.5817	0.5378	0.5577	0.582	0.1124	0.0505	0.0215	0.1981	0.1994	0.0369
absence_8	28	0.5253	0.8383	420	0.8339	9	-0.0379	0.6401	0.0915	10003	1.0918	12.4245	6.6658	1.4649	30.0272	0.5405	9.2574	4.1146	5.4257	28.853	0.1346	2.896	0	8.061	2.3485	31.9095	2.3548	15.0541	1.752	5.0844	29.4307	1.1088	0.5194	0.5209	0.4856	0.5237	0.5183	0.5188	0.4791	0.5084	0.4925	0.3411	0.5238	0.0063	0.0496	0.0174	0.1146	0.1163	0.0044
absence_9	28	0.4554	0.7601	420	0.8162	9	0.2692	0.7152	0.061	10002	8.2171	4.8137	2.2516	8.0974	45.0203	1.3891	13.9245	2.4555	5.8653	7.0292	0.9362	3.7353	5.3818	1.3205	5.0968	35.216	0.4136	26.2368	2.9886	4.8142	12.9223	1.8741	0.4358	0.4404	0.4456	0.4501	0.4497	0.4419	0.3735	0.4445	0.4308	0.4001	0.4469	0.0655	0.042	0.0164	0.2051	0.2091	0.0163
absence_10	28	0.9693	1.309	540	0.8681	9	-0.3572	0.6217	0.0953	10007	9.7712	4.134	2.9526	0.6567	25.5904	1.8616	30.5395	4.575	1.572	17.9581	0.3888	16.0056	3.0926	3.291	0.1156	23.1166	0.1699	24.3252	3.6028	0.6091	22.3907	3.281	0.9027	0.9478	0.9371	0.9677	0.9654	0.9674	0.7878	0.9375	0.955	0.7382	0.9608	0.151	0.0496	0.0545	0.2221	0.2248	0.0315
absence_11	28	0.6503	1.058	500	0.8491	9	0.878	0.7953	0.0859	10004	7.2214	9.1721	6.847	5.413	44.7038	0.8676	3.5184	4.3652	4.3551	13.5363	0	4.5848	9.9023	12.1866	1.7144	45.0094	0.0626	8.108	1.8389	3.665	12.928	0	0.6238	0.6045	0.5897	0.6451	0.6434	0.6497	0.6302	0.6338	0.6107	0.5245	0.6503	0.0585	0.0389	0.0252	0.2742	0.2765	0.0031
absence_12	28	0.8241	1.3036	580	0.8628	9	0.375	0.7451	0.0859	10006	26.0373	0.2429	5.8475	12.8738	39.5818	1.0287	6.3526	0.5852	1.3793	4.0007	2.0702	17.3994	0.083	0	7.7684	60.4969	0.5189	8.4651	0	1.7527	0.7375	2.7781	0.6733	0.8234	0.7846	0.8186	0.8191	0.8084	0.767	0.8093	0.8095	0.8094	0.8019	0.2605	0.0013	0.0156	0.409	0.4114	0.0188
absence_13	28	1.1234	1.5753	500	0.896	9	0.0489	0.718	0.0767	10004	4.8788	4.8825	8.7559	0.5869	32.8091	3.7003	19.8102	0.6618	0.1213	22.6201	1.1732	3.3062	1.264	10.1253	0.0097	32.1604	0.3847	16.9935	0.5552	0	27.8578	7.3432	1.0844	1.0899	0.9995	1.122	1.1207	1.1139	0.9776	1.122	1.1228	0.8225	1.0909	0.1042	0.0575	0.1577	0.3105	0.3132	0.0438
absence_14	28	0.4919	0.7637	420	0.8139	9	0.6761	0.8094	0.091	10005	3.7653	0.3279	4.463	2.6048	6.3569	8.8225	37.9392	0.7895	4.6253	30.1658	0.1398	8.6957	1.8753	17.1704	0.9155	7.8491	8.7951	48.2997	0	1.45	4.9092	0.0399	0.4698	0.4873	0.47	0.4914	0.4911	0.4418	0.3484	0.4883	0.471	0.4711	0.4917	0.0292	0.0144	0.0309	0.0429	0.0425	0.0369
absence_15	28	0.8307	1.3884	720	0.8896	9	-0.4908	0.567	0.0729	10004	9.2694	5.1229	11.3957	4.1927	32.5413	3.085	18.3531	6.6078	0.0364	9.3957	0	8.227	0	17.0364	0	41.4745	2.7922	18.9238	1.7292	0.4919	9.325	0	0.735	0.8305	0.7055	0.8282	0.8254	0.7855	0.7018	0.8015	0.8296	0.7473	0.8306	0.0861	0.0569	0.0893	0.2711	0.2728	0.0039
absence_16	28	0.5458	0.9141	360	0.8661	9	0.5397	0.7757	0.095	10004	13.444	12.8022	6.0939	4.7197	36.2947	0.3645	9.5337	2.6037	5.5623	8.5812	0.0001	9.5098	2.8488	4.0418	3.9067	38.3695	0	23.987	1.7652	4.702	10.8693	0	0.5041	0.503	0.5184	0.5436	0.5421	0.5447	0.4797	0.534	0.5159	0.4954	0.5458	0.0816	0.0626	0.0456	0.1859	0.1872	0.0043
absence_17	28	1.222	1.8154	500	0.9177	9	0.5203	0.7997	0.0621	10003	21.6167	22.9689	5.38	2.059	26.8236	0.7081	3.0752	0.6081	0.6872	13.4091	2.6639	13.3846	3.2038	3.6797	0.2771	38.1878	2.7532	8.6804	0.8749	0.5767	18.881	9.5007	1.0718	1.152	1.1696	1.2167	1.2187	1.1909	1.1871	1.213	1.2165	1.0337	1.149	0.2333	0.1914	0.0932	0.3561	0.3559	0.0662
absence_18	28	0.4542	0.7582	340	0.8069	9	0.4317	0.7361	0.075	10004	5.6868	12.2372	7.7738	3.7088	26.7245	0	36.1052	1.3502	0.7642	5.6493	0	6.7487	4.8928	6.0388	0.9431	27.4009	0	36.6911	3.0561	0.3827	13.8458	0	0.4295	0.4384	0.4221	0.452	0.4491	0.4542	0.3291	0.4451	0.4504	0.3962	0.4542	0.0439	0.041	0.0626	0.1151	0.1174	0.0113
absence_19	28	0.6266	1.1171	620	0.8721	9	-0.096	0.651	0.0721	10003	9.7528	6.8334	5.6641	9.7693	43.4409	0.256	9.8769	0.258	3.4907	9.0871	1.5709	11.5302	7.834	9.8894	3.9371	46.7166	0.1752	9.7219	0	1.1631	8.5822	0.4503	0.5746	0.5952	0.59	0.6215	0.6198	0.6263	0.574	0.6249	0.605	0.5832	0.6217	0.0734	0.0351	0.0206	0.2952	0.2974	0.0098
absence_20	28	0.7625	1.0985	260	0.8621	9	0.6566	0.8076	0.0612	10002	25.1618	2.7731	0.8131	0.0452	11.2086	12.9032	13.826	3.0799	0	29.8407	0.3485	25.8786	1.4803	0	0	13.659	8.5483	28.1337	3.0557	0	18.645	0.5995	0.6001	0.7506	0.7542	0.7623	0.7612	0.6956	0.6769	0.7419	0.7625	0.6408	0.7598	0.2185	0.0354	0.0331	0.0631	0.0642	0.0437
absence_21	28	0.6093	0.9077	500	0.7896	9	0.9115	0.876	0.0587	10004	2.2205	4.3583	13.7339	1.8706	39.0391	0.9177	9.0942	0.1296	4.9535	23.6826	0	2.0384	0	12.8148	0.4551	45.444	4.1444	13.9967	0	6.4368	14.6698	0	0.6069	0.6093	0.5176	0.6075	0.6064	0.594	0.547	0.6081	0.5658	0.4462	0.6088	0.0236	0.0328	0.0396	0.2076	0.2086	0
absence_22	28	0.5575	0.9298	440	0.7937	9	0.5321	0.7862	0.0635	10003	10.0768	11.4492	12.6124	5.6483	24.9263	0	19.9501	2.0235	0.0532	8.8592	4.4009	13.4905	0.6364	19.3569	0.3647	36.3678	0	23.7063	2.805	0	3.2723	0	0.5124	0.5565	0.4918	0.5552	0.5522	0.5577	0.4828	0.5448	0.5573	0.5188	0.5495	0.0839	0.0726	0.0951	0.138	0.1398	0.0251
absence_23	28	0.6107	1.0275	440	0.8351	9	0.9548	0.8161	0.0922	10004	7.4728	9.4956	29.7736	4.3823	19.0813	4.6132	5.2042	0.3083	5.7211	13.7449	0.2026	1.899	0	31.3926	1.0029	25.6911	3.8852	11.9678	1.8975	4.2248	17.3879	0.6512	0.5927	0.6103	0.4431	0.6077	0.6022	0.5598	0.5736	0.6081	0.5635	0.4439	0.6096	0.0461	0.0926	0.1236	0.0914	0.093	0
absence_24	28	0.5781	0.905	480	0.809	9	0.3487	0.7227	0.0799	10005	1.4969	21.496	4.1987	1.3084	27.98	0	22.0904	0.7218	3.5055	16.3481	0.8542	3.3563	9.6974	1.3227	1.8828	23.6896	0	35.5088	0.4874	1.6498	19.3463	3.0588	0.5721	0.5387	0.5623	0.5769	0.573	0.5781	0.4755	0.5738	0.5594	0.4998	0.5707	0.0361	0.097	0.0672	0.1149	0.1172	0.0098
absence_25	28	0.3089	0.6258	440	0.8115	9	0.5841	0.8061	0.066	10005	16.8389	35.2583	0.3522	1.6725	34.7462	0.1271	3.547	1.1376	1.4875	4.8328	0	21.7659	11.1217	0	0	40.6183	0.1178	11.4018	4.0657	0.9916	9.9172	0	0.2543	0.288	0.3063	0.3077	0.3061	0.3084	0.2983	0.3019	0.3056	0.2879	0.3089	0.0622	0.0816	0.0424	0.1013	0.1022	0.0158
absence_26	28	0.4385	0.7494	240	0.7767	9	0.7944	0.85	0.0497	10006	8.1998	3.4471	1.8245	3.9023	46.7093	1.9777	13.9403	6.7612	0	12.1588	1.079	7.7494	2.7189	0	0.4882	48.8795	0.7826	27.3988	0	0	9.576	2.4067	0.3998	0.4224	0.4291	0.437	0.436	0.4295	0.3871	0.4234	0.4385	0.3676	0.4352	0.0606	0.0111	0.0043	0.2006	0.2023	0.0044
absence_27	28	0.9184	1.4458	700	0.8849	9	-0.0258	0.6972	0.063	10006	8.603	5.101	6.106	9.0731	34.919	0.7056	25.0665	5.6471	2.4728	2.306	0	8.0999	13.2327	0.8164	4.9271	42.7853	0	17.3975	7.0484	0.5098	5.183	0	0.8377	0.8741	0.8988	0.9054	0.9115	0.9154	0.7343	0.8634	0.8783	0.8937	0.9184	0.1194	0.0912	0.0923	0.3884	0.3936	0.0162
absence_28	28	0.5152	0.8328	420	0.8171	9	1.0752	0.8374	0.0758	10005	3.7069	2.6279	4.6726	5.6622	26.2256	1.2023	35.5665	0.6807	0.8896	18.3016	0.4642	2.054	0.944	0	4.6177	33.2358	1.9405	33.8041	1.4426	0	21.5504	0.4109	0.5068	0.5143	0.4948	0.5113	0.5095	0.497	0.358	0.5094	0.5103	0.4652	0.515	0.0472	0.0097	0.0369	0.1385	0.1411	0.0086
absence_29	28	0.5482	0.8927	220	0.8283	9	0.7529	0.7875	0.0816	10004	3.8874	10.3645	8.6552	3.2025	19.8063	4.1097	20.7492	1.8722	4.859	22.4942	0	10.5825	0	4.0859	0	28.0326	1.233	29.5975	3.056	0	23.4125	0	0.5199	0.5461	0.5226	0.547	0.546	0.533	0.4698	0.5368	0.5262	0.4491	0.5482	0.0215	0.0718	0.0725	0.1144	0.1139	0.0494
absence_30	28	0.8952	1.2733	540	0.8647	9	0.4239	0.7338	0.099	10003	10.3717	21.2732	3.4977	0.5482	43.9877	0	1.0347	4.4676	0	14.8191	0	15.3559	2.8983	8.0884	0.0454	50.8423	0	0.8885	4.4777	0	17.4036	0	0.8167	0.8735	0.8587	0.8944	0.8843	0.8952	0.8899	0.8494	0.8952	0.7792	0.8952	0.1165	0.1319	0.0691	0.3417	0.345	0.0158
absence_31	28	0.4069	0.6045	240	0.7746	9	0.8597	0.7802	0.0809	10004	5.0049	0.0737	4.6304	3.3427	27.6608	18.9895	12.5733	0	0.465	27.1533	0.1064	6.9312	0.0059	0	1.1808	30.8581	16.2771	22.345	0	0	20.3515	2.0504	0.3893	0.4064	0.4008	0.4061	0.4038	0.3439	0.3731	0.4069	0.405	0.3271	0.4054	0.0172	0.0231	0.0214	0.09	0.0903	0.0663
absence_32	28	0.5821	0.9243	400	0.8061	9	0.9579	0.8449	0.0673	10009	11.0722	8.1132	8.5442	5.2023	19.5528	0.2513	25.7663	2.7445	16.6715	1.4252	0.6565	2.2004	0.4652	7.5166	0	42.127	0	37.8768	3.4175	0.9357	5.4609	0	0.5258	0.5757	0.5634	0.5782	0.5797	0.5798	0.4959	0.5676	0.5193	0.5682	0.5752	0.1216	0.044	0.0859	0.1529	0.1534	0.0112
absence_33	28	1.0156	1.4805	480	0.8894	9	1.6884	0.8636	0.0798	10004	2.6561	8.0936	21.5897	2.9714	27.1398	1.717	6.5122	0.0011	0	29.319	0	3.484	0	23.6555	1.4937	35.2829	2.527	10.0233	0	0	23.5337	0	1.0004	1.0135	0.805	1.0131	1.0085	0.9776	0.9532	1.0156	1.0156	0.7956	1.0156	0.0559	0.1399	0.1318	0.2885	0.2888	0.0014
absence_34	28	0.7932	1.3254	340	0.8833	9	0.405	0.6788	0.0831	10011	22.0433	1.4482	5.1105	8.1495	13.9131	6.8967	30.3949	0.1611	5.3254	6.552	0.0053	11.4386	0	8.2926	1.6682	12.1096	5.7011	40.7201	0.0849	5.3445	14.6404	0	0.7082	0.7931	0.7383	0.7873	0.7926	0.676	0.5436	0.7909	0.7359	0.7273	0.7932	0.2041	0.0043	0.0187	0.1635	0.164	0.0554
absence_35	28	0.8033	1.1848	560	0.836	9	0.4658	0.6825	0.0854	10001	4.4533	1.5959	2.8795	5.0745	23.0245	6.0263	23.037	1.0548	4.2407	28.3652	0.2483	4.4871	6.4364	1.1933	2.1734	32.8973	4.2145	27.9845	0	5.3163	15.2971	0	0.7759	0.7728	0.7888	0.8003	0.8017	0.7729	0.6684	0.7975	0.7608	0.6862	0.8024	0.0605	0.0266	0.0055	0.2134	0.2124	0.0369
absence_36	28	0.8384	1.209	580	0.8699	9	-0.1308	0.6536	0.0962	10006	3.8254	3.9366	1.94	4.0506	45.8909	0.1217	29.1343	1.1117	3.8746	6.1141	0	7.282	0.0125	0	0	58.7821	0.0649	22.4419	0.8523	3.8881	6.6762	0	0.7991	0.8355	0.8237	0.8341	0.835	0.8369	0.6554	0.8307	0.7933	0.7823	0.8383	0.0504	0.0332	0.0258	0.4087	0.4103	0.0004
absence_37	28	0.526	0.7623	260	0.8175	9	0.7958	0.8054	0.0874	10004	1.0592	0.2868	4.3075	0.4977	37.5233	11.2815	15.2835	1.1208	0	28.6357	0.0041	4.2714	0.9359	5.1549	0	48.277	4.9294	22.7084	0.803	0	12.7831	0.1367	0.5189	0.5221	0.5066	0.5253	0.5244	0.5041	0.4662	0.5204	0.526	0.4591	0.5259	0.0092	0.0439	0.0548	0.1888	0.1886	0.0476
absence_38	28	0.6053	0.9232	540	0.8396	9	1.4192	0.896	0.0627	10005	8.0141	23.4324	0.263	1.177	24.5719	5.1521	15.6964	0.0232	3.1683	13.7866	4.7151	6.9671	2.6939	0	1.2646	24.55	2.9426	22.2731	0	0	28.3168	10.9919	0.5711	0.557	0.6032	0.6023	0.603	0.5869	0.5333	0.6053	0.5926	0.4506	0.5506	0.0521	0.097	0.0314	0.1427	0.1429	0.0493
absence_39	28	0.7271	1.1615	380	0.8581	9	0.7386	0.7868	0.0856	10005	4.2378	5.0374	1.0552	3.7936	31.6429	0.1678	25.7142	3.0042	2.7033	16.9468	5.6968	2.305	8.9631	0.29	0.1593	28.0417	0	29.4577	2.3565	1.1531	17.8222	9.4516	0.7102	0.687	0.7179	0.7226	0.7252	0.7262	0.5655	0.7104	0.7114	0.5474	0.6616	0.0693	0.0208	0.0096	0.2447	0.2459	0.0098
absence_40	28	0.6891	1.0938	340	0.8456	9	-0.3074	0.5272	0.0878	10006	13.2413	30.4068	7.8718	0.6295	4.3405	17.6037	0.8267	0.8794	0.1365	22.9135	1.1504	7.5161	2.1868	28.8166	0	7.918	7.8341	3.4778	2.3166	0	33.9038	6.0303	0.6528	0.6748	0.6258	0.6887	0.6867	0.6656	0.6795	0.6794	0.6872	0.5165	0.6649	0.0475	0.2735	0.173	0.0091	0.0091	0.1536
absence_41	28	0.8739	1.3915	700	0.8903	9	0.7142	0.744	0.0927	10004	20.1105	6.1857	25.481	2.8078	9.3017	17.4141	3.5693	0.1043	0.9367	14.0132	0.0758	22.1315	1.0989	32.1763	3.8398	16.233	5.5395	4.0394	0.1637	0	14.778	0	0.7624	0.8649	0.6877	0.8728	0.8663	0.8146	0.8501	0.8722	0.8654	0.7932	0.8725	0.146	0.1191	0.2612	0.0826	0.0839	0.1536
absence_42	28	0.5334	0.8616	440	0.8155	9	0.5828	0.7422	0.1021	10005	7.6486	25.017	5.6229	0.6072	37.4207	0.0331	2.3638	2.725	3.9583	14.5959	0.0076	7.3256	1.7765	0	0	57.3985	0	7.5321	2.9443	0.6775	22.3092	0.0363	0.4937	0.5073	0.5096	0.5326	0.5286	0.5333	0.5241	0.5232	0.5184	0.4646	0.5334	0.0439	0.0929	0.0444	0.1867	0.1874	0.0098
absence_43	28	0.7309	1.045	560	0.8445	9	0.6693	0.7785	0.058	10005	2.5318	19.0176	10.3324	0.2468	19.4851	1.1917	22.4633	0.0049	8.1365	16.5898	0	5.0381	6.4116	9.155	0	22.983	1.6137	33.8959	0.0347	1.0603	19.8076	0	0.7102	0.7075	0.6888	0.7303	0.7274	0.725	0.6179	0.7308	0.684	0.642	0.7315	0.0527	0.1198	0.0992	0.1013	0.1027	0.0368
absence_44	28	0.7888	1.1058	440	0.882	9	0.5064	0.7881	0.0727	10007	22.7873	11.177	7.008	3.263	48.231	0.0888	3.8111	0.2029	0.0363	3.2597	0.1349	25.3008	1.914	3.5747	0.3461	52.0465	0.2961	8.3356	0	0.032	7.0537	1.1005	0.6289	0.7563	0.7535	0.7867	0.7839	0.7885	0.7648	0.7875	0.7886	0.758	0.786	0.2235	0.049	0.0529	0.3988	0.4012	0
absence_45	28	0.7584	1.115	240	0.8441	9	0.7005	0.8193	0.0412	10004	7.1058	7.2888	20.1487	0.3647	29.1531	0	1.1289	3.7864	0.0049	31.0188	0	9.5663	0	12.7562	0.1264	45.8874	0	4.1505	3.872	0.2422	23.3989	0	0.7218	0.7492	0.6681	0.7577	0.7529	0.7584	0.7532	0.7389	0.7583	0.6118	0.7584	0.0767	0.0831	0.0611	0.2068	0.2073	0.0098
absence_46	28	0.8198	1.2608	460	0.8475	9	0.4034	0.7209	0.1024	10004	7.3164	16.3112	25.9386	3.8651	31.4282	1.4844	5.4627	2.5294	0.2263	5.4378	0	5.6739	2.3262	32.4826	0	45.5643	1.9438	5.6231	0.8816	0	5.5045	0	0.7687	0.809	0.6568	0.8154	0.8136	0.8005	0.7834	0.8026	0.8161	0.7381	0.8198	0.0743	0.1597	0.2247	0.2822	0.2825	0.0247
absence_47	28	0.6027	0.961	340	0.833	9	0.1679	0.6801	0.0863	10005	6.1389	0.9212	2.4731	9.2592	24.9538	2.5946	31.9598	3.6984	0.0996	17.3551	0.5463	8.2562	4.3334	0.9764	5.7602	36.2623	0.7878	24.3715	2.5917	0.2741	13.8381	2.5484	0.5575	0.5867	0.5977	0.5965	0.6006	0.5955	0.4598	0.5822	0.6018	0.491	0.5968	0.0571	0.0108	0.0052	0.2178	0.2167	0.0158
absence_48	28	0.4848	0.7525	400	0.802	9	0.8408	0.8626	0.0376	10002	10.7247	4.326	0.4885	12.2718	30.7266	0.0587	29.9256	1.9767	0	9.5015	0	13.4251	4.0789	0.5414	3.338	31.2508	0	35.5599	3.1631	0	8.6427	0	0.4431	0.4703	0.4829	0.48	0.4819	0.4845	0.3698	0.4535	0.4848	0.4523	0.4848	0.0646	0.0263	0.0136	0.1825	0.1835	0.0014
absence_49	28	0.3703	0.6	300	0.7877	9	0.4426	0.7428	0.0686	10002	0.6662	0.8311	1.5472	1.8894	36.4296	0.0855	24.382	4.5286	0	28.0072	1.6332	2.0352	3.0175	3.1989	0.917	34.9268	0.2212	27.9661	4.312	0	23.1558	0.2495	0.368	0.3636	0.3604	0.3687	0.3675	0.37	0.2856	0.3519	0.3703	0.2955	0.3702	0.0027	0.0001	0.0302	0.1136	0.115	0.0046
absence (average)	28	0.6753	1.0488	442.8	0.8435	9	0.4985	0.7536	0.076	10004.3	8.9702	8.5178	6.9324	4.0914	30.2216	3.3958	16.4945	2.37	2.5237	15.7218	0.7609	9.1594	3.0093	7.3894	1.5565	36.534	2.2588	20.4901	1.9023	1.2467	14.7963	1.6572	0.6251	0.6583	0.6323	0.6724	0.6711	0.656	0.5893	0.6615	0.6588	0.5801	0.667	0.0808	0.0598	0.0569	0.2066	0.2078	0.0281
presence_0	47	0.5892	0.8308	520	0.7967	15	0.3873	0.7683	0.0427	10007	7.7508	6.3478	0.5468	0	4.1986	7.2721	4.0951	1.605	0.3528	57.216	10.6152	1.7182	9.1888	0.5294	0	0.8033	14.3689	0	0.6166	0	54.2963	18.4785	0.5567	0.5352	0.5838	0.5891	0.588	0.5255	0.573	0.578	0.5859	0.4461	0.4976	0.0363	0.016	0.0522	0.064	0.0677	0.1154
presence_1	47	0.6058	0.8968	720	0.8334	15	0.1774	0.6725	0.0546	10005	19.0302	1.3419	2.1081	2.4686	2.5164	0.7792	0.9551	0	1.1884	53.2815	16.3306	12.7501	0.8472	13.4831	4.829	3.8288	2.3089	3.5279	0	0.3933	39.4636	18.5682	0.472	0.5952	0.5895	0.6016	0.5999	0.6021	0.6007	0.6058	0.5964	0.4774	0.5113	0.1061	0.0027	0.0613	0.0633	0.0655	0.0365
presence_2	47	0.7103	1.0746	440	0.8662	15	-0.2135	0.6489	0.0673	10007	3.9343	3.6181	3.2557	0.1485	36.0076	11.6459	2.0156	5.458	0.1355	25.5255	8.2552	0.8244	11.0425	6.5588	1.2589	18.231	14.28	3.5789	8.5482	0.3896	21.1968	14.091	0.6864	0.6523	0.6622	0.7093	0.7086	0.6375	0.6965	0.6719	0.7086	0.6244	0.6361	0.0075	0.0104	0.0146	0.2432	0.2476	0.136
presence_3	47	0.6577	0.9148	540	0.8462	15	0.3255	0.7251	0.0644	10002	7.8695	19.177	3.9066	0.2432	7.4917	0.1682	3.7657	0.5202	0	45.836	11.0219	2.4647	18.718	22.2113	0.6823	5.7863	0	7.8772	1.1736	0	22.8921	18.1944	0.6183	0.5682	0.6283	0.6575	0.6541	0.6546	0.6322	0.6535	0.6577	0.5987	0.56	0.0332	0.1067	0.1522	0.0559	0.0595	0.0573
presence_4	47	0.6261	0.8527	420	0.8389	15	0.4802	0.7597	0.0453	10006	11.7573	5.9762	0.0386	0.1423	13.046	0.0083	6.4166	2.1855	1.5325	41.1438	17.7529	12.3884	13.2665	0	2.3707	5.7158	0.3048	6.5781	2.9278	1.2522	24.3805	30.8151	0.5452	0.5723	0.6255	0.6255	0.6214	0.626	0.5991	0.6139	0.6171	0.5698	0.5455	0.0829	0.0081	0.0378	0.1212	0.1268	0.0154
presence_5	47	0.6811	0.9563	380	0.8559	15	0.2508	0.7273	0.0544	10005	29.597	1.5826	1.8293	5.4247	12.6541	13.8771	2.9083	0.9803	0	12.3541	18.7925	29.0308	3.2735	9.7518	0	3.4033	17.5607	0	2.9342	0	2.9819	31.0637	0.5175	0.6689	0.6676	0.6812	0.6774	0.6432	0.6708	0.6714	0.6811	0.6723	0.5534	0.1649	0.0036	0.0585	0.1703	0.1772	0.0783
presence_6	47	0.7494	1.0061	440	0.8487	15	0.361	0.7392	0.0585	10003	10.8447	5.2028	0.3547	1.6898	0.9393	23.8375	0	2.4694	0.022	41.5992	13.0405	5.0506	9.4585	0.8006	1.3644	4.4771	23.4636	0	1.4417	0	38.8029	15.1407	0.6587	0.6912	0.7419	0.7479	0.7481	0.6033	0.7494	0.7298	0.7491	0.4827	0.6286	0.0323	0.0544	0.0734	0.0151	0.0156	0.2378
presence_7	47	0.6989	0.9629	480	0.8564	15	0.416	0.7631	0.0484	10009	28.175	0.6587	0.5482	0.2973	8.6102	16.0677	1.1089	2.2339	0.6217	29.1517	12.5267	23.7097	1.1267	5.2107	1.0726	6.3416	18.956	4.0502	4.0934	0.2711	14.6866	20.4812	0.5081	0.6957	0.6849	0.6982	0.6948	0.6269	0.6873	0.6821	0.6969	0.6576	0.6229	0.1558	0.0108	0.0557	0.1204	0.1255	0.1159
presence_8	47	0.5843	0.8177	320	0.8147	15	-0.0489	0.6408	0.0427	10005	12.228	0.4363	0.914	1.4504	12.1502	33.8903	0.3791	1.2049	0.0366	32.9791	4.331	5.4457	4.4622	0	2.8811	6.2575	30.3699	0.7619	0	0.0627	38.8946	10.8645	0.5183	0.5788	0.5783	0.5831	0.5787	0.447	0.5818	0.5779	0.584	0.469	0.5571	0.0414	0.0037	0.0521	0.0921	0.095	0.2025
presence_9	47	0.529	0.7497	420	0.8169	15	0.5282	0.7627	0.0574	10003	11.2544	5.503	1.0882	0.1168	4.3077	0.2219	6.5994	1.8344	0.1196	54.9587	13.9958	2.4404	9.9553	6.3174	0	2.7409	0	6.0306	2.5493	0	44.9676	24.9986	0.4903	0.4812	0.5152	0.5288	0.5262	0.5289	0.5028	0.5152	0.5286	0.3655	0.4141	0.0421	0.0077	0.0537	0.0511	0.0546	0.0111
presence_10	47	0.4507	0.6493	340	0.8044	15	0.3136	0.7168	0.0617	10004	7.8093	18.177	1.5562	3.3296	6.0088	0	3.5143	0.0984	5.2587	47.6126	6.635	4.0849	23.1736	10.7403	6.2218	5.3799	0	3.9725	0.4151	4.3781	25.9234	15.7103	0.4222	0.3837	0.4424	0.4491	0.4492	0.4507	0.4363	0.45	0.4251	0.4015	0.4149	0.0139	0.0612	0.1134	0.0539	0.0547	0.0395
presence_11	47	0.5879	0.8902	560	0.8298	15	0.4695	0.7647	0.0437	10004	9.8912	1.8461	0.6949	1.5588	16.8883	7.0349	0.9506	0.5732	0.0301	51.2883	9.2436	5.9948	10.1919	0.4016	3.689	8.9205	15.9491	1.1765	1.9455	0.0156	35.8798	15.8356	0.5155	0.5755	0.5823	0.5862	0.5833	0.5424	0.582	0.5756	0.5877	0.4919	0.5394	0.0525	0.0001	0.0157	0.1622	0.1663	0.0752
presence_12	47	0.6506	0.9354	580	0.8416	15	0.4074	0.77	0.0386	10005	13.0081	2.6991	0.0001	2.7628	10.7332	3.5138	0.2513	0.3381	3.7491	50.5252	12.4191	12.8559	5.5944	0.0779	2.0844	7.7966	10.2408	0	0.9101	1.6948	44.134	14.6111	0.5323	0.6348	0.6507	0.6489	0.6479	0.6082	0.6498	0.6483	0.633	0.4909	0.5872	0.0651	0.0083	0.043	0.1335	0.1377	0.0658
presence_13	47	0.6076	0.8405	400	0.8363	15	0.389	0.7365	0.0536	10003	11.4729	5.2884	1.1474	0	5.629	8.8715	0.1244	0.4471	0.2239	57.3841	9.4113	9.281	7.9728	2.0599	0	0.9718	15.2706	0.3936	0.3128	0	50.3042	13.4334	0.5291	0.5534	0.6014	0.6076	0.6071	0.54	0.607	0.6058	0.6062	0.401	0.5558	0.0444	0.0099	0.0332	0.0607	0.064	0.1156
presence_14	47	0.5863	0.819	360	0.8044	15	0.3935	0.7832	0.0552	10003	12.0633	4.657	0.3284	0	15.9873	0.6556	6.0894	0.0083	4.7485	43.6897	11.7726	13.421	12.5944	0	0.0537	1.444	8.9854	0	0.1463	5.6667	24.9978	32.6908	0.5172	0.5479	0.5837	0.5863	0.5849	0.5772	0.5595	0.5862	0.5622	0.5458	0.4983	0.043	0.011	0.0298	0.1062	0.1113	0.0554
presence_15	47	0.5467	0.7659	560	0.8287	15	0.4434	0.7225	0.0536	10005	10.7022	2.0286	1.7884	6.2882	11.1555	9.8687	12.5209	1.3309	5.0448	29.8725	9.3994	14.4722	3.6535	4.83	7.6646	3.4431	21.7052	0	1.0076	2.9355	34.5784	5.7099	0.4699	0.5385	0.5334	0.5462	0.5449	0.4791	0.5256	0.5421	0.5295	0.4614	0.5305	0.054	0.0063	0.0405	0.1142	0.1195	0.0872
presence_16	47	0.8827	1.2691	620	0.88	15	0.7633	0.8082	0.0472	10004	27.8928	3.4328	2.3229	0.2525	13.5156	10.5742	1.4197	1.2867	3.2226	33.0006	3.0796	17.1675	12.1073	9.6177	0.8015	5.1175	17.6462	3.3402	1.8155	2.3622	24.9114	5.113	0.6204	0.8171	0.8231	0.8826	0.8823	0.7708	0.8706	0.8714	0.8609	0.7918	0.8509	0.18	0.0152	0.0294	0.1238	0.1287	0.169
presence_17	47	0.7107	0.9584	360	0.8512	15	0.4775	0.766	0.0456	10008	19.6478	0.9876	0.6244	0.4371	18.2412	9.335	4.642	1.0806	0.1048	29.8842	15.0153	19.5639	0.2619	0.0177	1.8953	6.7849	21.3298	8.1069	2.0189	0	28.5521	11.4686	0.5488	0.7086	0.7066	0.7102	0.7081	0.6293	0.6863	0.7001	0.7103	0.6343	0.6742	0.1364	0.0064	0.0561	0.1541	0.1594	0.0898
presence_18	47	0.6181	0.8783	300	0.8449	15	0.4634	0.7481	0.0595	10006	23.5462	0.0002	0.5691	0.1359	5.5188	15.0418	2.2529	2.4986	0.0603	41.7766	8.5995	24.76	0	4.0076	0.0894	0	23.5189	1.5745	4.8552	0.116	29.6997	11.3787	0.4589	0.6181	0.614	0.6181	0.616	0.5387	0.6127	0.5994	0.6178	0.5341	0.58	0.102	0.0015	0.0321	0.084	0.0885	0.1361
presence_19	47	0.7196	0.9995	440	0.8451	15	0.057	0.6775	0.0732	10004	10.8105	2.8874	1.6627	1.6597	2.3083	9.3746	15.9182	0.4044	4.3479	39.0921	11.5342	9.3468	3.7975	4.6077	1.2782	1.6633	19.9314	6.2975	0.9154	4.1178	25.0002	23.0443	0.6427	0.6942	0.7109	0.7191	0.719	0.6411	0.6615	0.7141	0.6863	0.654	0.5906	0.0611	0.0165	0.0677	0.0641	0.0667	0.1319
presence_20	47	0.8294	1.0931	420	0.8535	15	0.6037	0.7835	0.0697	10005	25.1993	3.8637	1.2827	1.5526	7.3475	6.9612	2.5016	0	3.7073	38.8234	8.7608	19.8295	7.0062	1.1126	3.0086	4.0544	7.7667	9.8401	0	2.5694	31.0472	13.7653	0.6488	0.7972	0.8291	0.8291	0.828	0.7866	0.8097	0.8294	0.8046	0.7242	0.7339	0.1534	0.0276	0.1381	0.0961	0.1007	0.119
presence_21	47	0.5642	0.8391	540	0.8297	15	0.6609	0.808	0.0453	10005	19.9562	0.7827	3.7469	1.8852	0.9877	11.7417	9.5715	1.5556	0.0378	42.9622	6.7725	14.3505	0.1816	3.1129	4.8408	2.0177	20.7492	7.9724	2.5608	0	29.7679	14.4461	0.4306	0.5605	0.5434	0.5616	0.5639	0.4677	0.5357	0.5509	0.564	0.4218	0.517	0.0833	0.0061	0.0137	0.0055	0.0061	0.1157
presence_22	47	0.7184	1.1269	640	0.8612	15	0.7323	0.8199	0.0577	10004	16.3135	6.1492	3.0021	0.5019	5.7944	18.2944	0	8.4267	2.1065	28.1784	11.2328	9.848	7.0878	0	2.3828	2.008	21.4131	0	12.4994	0.9227	29.7983	14.0398	0.5868	0.6718	0.6846	0.7155	0.7181	0.6175	0.7184	0.6452	0.709	0.6057	0.6613	0.0587	0.052	0.0782	0.0492	0.0514	0.1773
presence_23	47	0.8212	1.2337	680	0.8868	15	0.3145	0.7299	0.0506	10009	6.3789	13.8597	2.362	2.2345	10.6139	3.4119	2.707	0.9849	0.0892	44.0456	13.3124	3.4903	17.7488	7.3724	0	4.2322	3.3929	0	0.2548	0.2467	43.3168	19.945	0.7653	0.6767	0.7934	0.8211	0.8189	0.7917	0.8027	0.8164	0.8201	0.6657	0.7027	0.0573	0.0804	0.06	0.1172	0.1218	0.0991
presence_24	47	0.6503	0.9949	600	0.8435	15	0.6055	0.7741	0.0422	10005	10.4382	10.5448	0.2591	1.9002	13.5309	4.256	5.2946	0	0.4838	40.7545	12.538	3.7351	13.2552	1.2188	0	5.9793	4.2685	3.9508	0	0.8092	48.7232	18.0599	0.5846	0.593	0.6494	0.6503	0.645	0.6409	0.629	0.6503	0.6469	0.5192	0.5728	0.051	0.0508	0.0905	0.1084	0.1132	0.0784
presence_25	47	0.5983	0.9747	400	0.8544	15	0.6395	0.8039	0.0458	10002	4.8788	6.2127	3.9959	0	14.5448	2.8542	12.569	2.4959	0.087	37.9141	14.4477	8.2799	14.1126	10.6132	0	0.7759	10.5036	1.3564	3.2674	0.35	29.0435	21.6975	0.5543	0.5261	0.5492	0.5983	0.5974	0.5617	0.5643	0.5781	0.5978	0.5026	0.4873	0.0299	0.008	0.0509	0.0992	0.104	0.0554
presence_26	47	0.5959	0.8476	540	0.8384	15	0.4719	0.7387	0.0501	10005	4.54	11.6798	0.9025	0.0026	26.5372	0.4524	9.381	0.0624	1.7941	32.1678	12.4803	3.4467	19.0156	10.4833	0	10.9539	1.4142	6.3944	0.1054	1.7209	20.4448	26.0209	0.5649	0.5185	0.58	0.5958	0.591	0.5946	0.5679	0.5956	0.5872	0.5587	0.5263	0.0377	0.03	0.0387	0.1689	0.1753	0.0319
presence_27	47	0.5785	0.8637	380	0.8472	15	0.5456	0.8197	0.0375	10008	23.5332	6.2823	0.58	0	5.4751	10.9773	2.2592	1.5451	0.078	28.2194	21.0504	27.1288	8.7483	2.4166	0	0.4348	16.2712	3.5845	3.5369	0	16.8152	21.0637	0.3793	0.5469	0.5717	0.5785	0.5775	0.5045	0.5644	0.5699	0.5783	0.5466	0.5052	0.0956	0.0233	0.0704	0.0736	0.0778	0.0897
presence_28	47	0.5153	0.7159	340	0.8155	15	0.4396	0.7427	0.0511	10003	25.3537	4.5787	0	0	5.9492	0.988	4.9945	1.6649	0.07	42.705	13.696	27.6792	5.8342	0	0	3.6094	3.1727	6.5347	4.9108	0.8623	15.3406	32.056	0.3829	0.4942	0.5153	0.5153	0.5128	0.5109	0.4985	0.5105	0.5149	0.4864	0.4372	0.1135	0.0145	0.0498	0.072	0.0762	0.0281
presence_29	47	0.5566	0.8175	600	0.8332	15	0.1706	0.6847	0.0635	10003	20.4661	6.2895	2.1583	0.0549	1.5651	11.7292	3.6882	2.3811	0.2311	40.0024	11.4341	14.6485	10.3933	9.2391	0	1.1165	19.5514	1.4774	3.6833	0.6391	31.018	8.2334	0.3981	0.4945	0.5229	0.5562	0.5563	0.4595	0.5312	0.539	0.5549	0.4274	0.5236	0.0565	0.0272	0.0351	0.0252	0.0274	0.1189
presence_30	47	0.5528	0.8417	360	0.8394	15	0.7768	0.8317	0.0425	10003	13.4668	2.6581	1.2359	0	2.1492	6.136	1.9778	1.5659	0	59.1831	11.6274	10.6167	3.448	7.2038	0	0.2323	11.2444	4.6347	4.0992	0	36.4436	22.0773	0.4719	0.5363	0.5317	0.5528	0.552	0.5198	0.5433	0.5368	0.5528	0.3985	0.4678	0.051	0.0065	0.0349	0.0328	0.0352	0.0871
presence_31	47	0.8166	1.0837	440	0.8646	15	0.9299	0.8501	0.0338	10004	20.5788	9.7049	0.0358	0	6.98	13.5075	0.1382	0.1658	0.0531	35.6648	13.1711	18.6057	3.7428	0.0551	0	0.9343	17.6658	0.8468	0.0475	0	42.4762	15.6259	0.62	0.751	0.8163	0.8166	0.8144	0.7051	0.8155	0.8153	0.8163	0.6347	0.7261	0.1304	0.0524	0.0569	0.1123	0.1176	0.136
presence_32	47	0.7217	1.0005	420	0.8661	15	-0.0386	0.6968	0.0677	10005	19.9432	5.9198	1.242	0.1974	10.3933	5.3475	2.5819	1.981	3.3048	43.5605	5.5287	15.8838	10.479	0.7271	0	2.9818	13.0288	1.4168	2.2353	2.0945	44.4496	6.7033	0.5693	0.6654	0.7109	0.7216	0.7202	0.6676	0.7137	0.7042	0.7052	0.6118	0.6921	0.1293	0.0239	0.024	0.1129	0.1177	0.1007
presence_33	47	0.6052	0.9109	320	0.8335	15	0.871	0.8294	0.0494	10004	7.6731	14.3708	1.0195	0.0005	4.1526	0.1441	8.6367	0	4.4511	45.9227	13.629	3.6106	13.3905	9.7006	0	0.2293	0.9597	8.7811	0	2.988	35.5091	24.8312	0.5581	0.5123	0.5931	0.6054	0.6047	0.6005	0.5738	0.6052	0.5826	0.529	0.513	0.0397	0.0568	0.0947	0.0509	0.0541	0.0463
presence_34	47	0.5282	0.7803	420	0.822	15	0.4978	0.7477	0.0492	10001	5.3391	11.194	0.1914	0.3222	16.9263	4.066	0.5674	12.9155	0	39.1041	9.3742	3.9715	15.045	3.4756	3.2893	9.9805	8.9813	0	17.4631	0	23.642	14.1517	0.4951	0.4628	0.5247	0.5269	0.527	0.5039	0.5257	0.4897	0.5282	0.4743	0.4808	0.004	0.0542	0.0917	0.0897	0.0926	0.1038
presence_35	47	0.767	1.0432	520	0.8524	15	0.6216	0.7939	0.04	10003	18.852	7.0864	0.0423	0.4353	11.6364	16.8465	0.0119	2.1487	3.9455	29.225	9.7699	16.653	10.6945	0.8365	3.1108	8.1965	15.8587	0.0775	3.4488	3.9586	27.0429	10.1222	0.6087	0.7194	0.7662	0.7666	0.7655	0.6918	0.767	0.7528	0.7453	0.706	0.7052	0.0844	0.0596	0.1186	0.0912	0.0949	0.1901
presence_36	47	0.7189	1.0234	540	0.8525	15	0.4175	0.7396	0.0605	10005	10.6823	6.6555	5.1926	0.0062	5.4157	0.0994	31.2096	0.615	0.3145	26.9273	12.8818	7.531	2.8726	27.0394	0.1014	1.3137	0	15.2408	0	0.1021	24.0634	21.7357	0.6542	0.6628	0.6609	0.7189	0.7163	0.719	0.596	0.7154	0.7173	0.6224	0.572	0.1022	0.0126	0.0849	0.0793	0.0836	0.028
presence_37	47	0.6514	0.9432	340	0.8452	15	0.3183	0.744	0.0496	10004	6.7089	16.5789	0.3176	0	5.0901	7.1242	0.3266	0.0216	0.0078	51.5078	12.3166	7.8045	20.0861	0.5119	0	1.2691	11.6557	0.6273	0.2135	0	44.0593	13.7727	0.5882	0.5459	0.6473	0.6515	0.6514	0.6139	0.6489	0.6514	0.6515	0.4986	0.59	0.0222	0.0979	0.0994	0.0366	0.0394	0.136
presence_38	47	0.7063	0.9975	500	0.8541	15	0.2738	0.7226	0.0537	10002	19.9902	7.6676	0.8605	0	2.4915	0.0121	20.7539	2.9761	0.1088	34.5123	10.627	26.9028	3.0381	5.9198	0	0	0	10.2015	5.5257	0	36.9109	11.5011	0.5249	0.6801	0.7027	0.7062	0.7052	0.706	0.6321	0.6896	0.7052	0.6158	0.6674	0.1362	0.0459	0.0957	0.0562	0.0593	0.0093
presence_39	47	0.7104	1.039	480	0.8558	15	0.5514	0.765	0.046	10006	1.7358	4.1633	0.6198	3.1962	30.479	5.3515	2.3834	5.5226	2.8114	34.8762	8.8606	0	5.3846	1.7039	5.2384	23.654	11.6306	0.9012	4.5808	1.3924	36.0677	9.4464	0.7029	0.6838	0.7066	0.7096	0.7071	0.6519	0.6993	0.6518	0.6955	0.5878	0.6619	0.0228	0.0231	0.0094	0.2561	0.2627	0.0771
presence_40	47	0.7998	1.1081	500	0.8694	15	0.7029	0.802	0.0449	10007	23.2888	7.0452	1.3906	0.4293	10.8318	8.6457	1.2117	0	0.4483	33.809	12.8995	19.7263	12.2669	6.7171	1.5604	1.4462	16.7519	5.191	0	0.1836	23.0479	13.1087	0.5993	0.7306	0.7704	0.798	0.7992	0.7131	0.7893	0.7998	0.797	0.7122	0.7399	0.1556	0.0351	0.0747	0.1067	0.1113	0.1187
presence_41	47	0.6344	0.8794	320	0.8422	15	0.4433	0.7647	0.0436	10005	19.1685	2.2083	0.6224	0.3475	0.7187	14.6972	17.4396	5.15	0.6523	27.4752	11.5202	14.1992	3.887	2.9533	0.3926	1.4074	10.5264	14.0584	3.2846	0.3066	27.2506	21.7338	0.5186	0.62	0.6266	0.6339	0.6326	0.5971	0.5852	0.6015	0.631	0.5486	0.5519	0.0905	0.0373	0.0902	0.0102	0.0114	0.1343
presence_42	47	0.6691	0.9638	560	0.8508	15	0.2988	0.7374	0.0476	10010	22.4705	1.6431	6.728	0.5446	5.0126	11.4456	0.3249	17.9092	0	23.3642	10.5573	23.0508	2.0204	4.262	0.4218	0	34.9366	0.4392	15.9993	0	3.6427	15.2272	0.4988	0.6597	0.6344	0.6688	0.6682	0.5243	0.6672	0.6083	0.669	0.6558	0.6241	0.1153	0.0115	0.0704	0.081	0.0847	0.1156
presence_43	47	0.6094	0.8366	440	0.8361	15	0.2638	0.7316	0.0488	10006	5.1599	5.4427	0	0.138	8.7842	4.1456	22.0904	0.9436	0.0115	45.5071	7.7771	0.9149	5.2389	0	0	3.3887	14.0923	8.7621	2.1773	0	48.9967	16.4291	0.5834	0.5791	0.6098	0.6094	0.6071	0.5644	0.541	0.6021	0.6098	0.4652	0.5593	0.0195	0.0207	0.0377	0.1046	0.1092	0.1036
presence_44	47	0.5836	0.8346	420	0.8327	15	0.458	0.7412	0.0555	10001	6.6007	5.4733	5.1991	0.0024	16.218	9.9148	1.1411	0.2811	0.0623	47.6281	7.4792	1.2931	10.1028	6.4894	0.0694	2.871	19.339	0.911	0.0072	0	44.7438	14.1734	0.5602	0.5211	0.5481	0.5835	0.5814	0.4903	0.5782	0.5825	0.5834	0.3818	0.5364	0.0123	0.0078	0.0319	0.11	0.114	0.132
presence_45	47	0.6404	0.9574	300	0.8444	15	0.2	0.7131	0.0607	10005	12.1022	4.9448	3.4387	0.7351	10.6258	28.3314	0.2366	0.0555	0.1512	31.1422	8.2366	6.9296	4.796	5.6087	1.1537	4.8418	36.8512	1.4108	0.1227	0.0674	27.682	10.5361	0.5273	0.5939	0.5925	0.6385	0.64	0.4363	0.6309	0.6403	0.6397	0.543	0.5755	0.0262	0.0184	0.0355	0.061	0.062	0.2128
presence_46	47	0.5154	0.7432	460	0.8157	15	0.0626	0.6989	0.0695	10003	8.5714	5.5562	1.6215	0.0623	12.2434	2.346	0.0142	1.52	4.7155	51.2012	12.1483	4.0813	7.5206	8.7154	0.4876	4.8285	5.0451	0	2.3473	2.9652	40.8618	23.1473	0.4712	0.47	0.5039	0.5153	0.5131	0.5052	0.5154	0.4995	0.4965	0.4269	0.423	0.0267	0.0151	0.0233	0.0974	0.1024	0.0463
presence_47	47	0.5842	0.9167	420	0.8395	15	0.76	0.8368	0.0393	10006	13.3733	3.1038	5.3859	1.4121	15.9676	13.1514	9.3551	0.0984	0.5579	33.3426	4.2519	10.0862	6.0083	9.4126	2.8176	6.1259	30.093	0.771	0	0	25.9615	8.724	0.4997	0.5718	0.5308	0.5824	0.582	0.4795	0.5684	0.584	0.5824	0.5083	0.5555	0.0637	0.0252	0.0226	0.1158	0.12	0.1157
presence_48	47	0.7507	1.1172	560	0.8462	15	0.2996	0.7055	0.0599	10011	4.3785	0.1427	7.691	0	32.6958	3.6169	0.0948	4.1129	3.0404	36.9698	7.2573	0	0.0015	19.0799	0	6.5479	11.7243	0.7946	0.925	3.0513	49.1082	8.7673	0.7097	0.7505	0.703	0.7507	0.7454	0.7188	0.7498	0.7339	0.7366	0.6187	0.6986	0.0573	0.0047	0.0947	0.2715	0.28	0.0573
presence_49	47	0.6811	0.9635	420	0.8487	15	0.6233	0.7919	0.0527	10006	7.568	4.9842	1.717	0.2126	20.1175	4.4879	14.5587	0.0099	3.717	21.2656	21.3615	6.6017	12.295	7.9129	1.4073	2.3635	17.7726	5.7474	0	3.3062	8.276	34.3175	0.6256	0.6399	0.6542	0.681	0.6801	0.6305	0.6433	0.681	0.6609	0.6601	0.5764	0.036	0.0127	0.0399	0.1494	0.1558	0.1007
presence (average)	47	0.6493	0.9312	461.6	0.8423	15	0.4272	0.753	0.0519	10004.9	13.8799	5.7727	1.7625	0.8916	10.5837	8.2624	5.279	2.0733	1.3568	38.9227	11.2154	11.1534	8.3278	5.5023	1.3704	4.338	13.457	3.5838	2.6385	1.0438	31.4419	17.143	0.5502	0.6069	0.632	0.6487	0.6472	0.5929	0.6298	0.6365	0.6422	0.5486	0.5787	0.0703	0.026	0.0586	0.0979	0.1019	0.0987
Species	#Training samples	Regularized training gain	Unregularized training gain	Iterations	Training AUC	#Test samples	Test gain	Test AUC	AUC Standard Deviation	#Background points	area contribution	bonitet contribution	diametr contribution	fr_any contribution	fr_excel contribution	hyhrotop contribution	neignborn contribution	povnota contribution	trofotop contribution	vik contribution	vysota contribution	area permutation importance	bonitet permutation importance	diametr permutation importance	fr_any permutation importance	fr_excel permutation importance	hyhrotop permutation importance	neignborn permutation importance	povnota permutation importance	trofotop permutation importance	vik permutation importance	vysota permutation importance	Training gain without area	Training gain without bonitet	Training gain without diametr	Training gain without fr_any	Training gain without fr_excel	Training gain without hyhrotop	Training gain without neignborn	Training gain without povnota	Training gain without trofotop	Training gain without vik	Training gain without vysota	Training gain with only area	Training gain with only bonitet	Training gain with only diametr	Training gain with only fr_any	Training gain with only fr_excel	Training gain with only hyhrotop
[truncated: 117 more columns]
